# Supplementary material for: Greater than pH 8: The pH dependence of EDTA as a preservative of high molecular weight DNA in biological samples
Source: PubMed Central journal article supplement (PMC9870144; doi:10.1371/journal.pone.0280807), 2023-01-23
Supplement: pone.0280807.s001.pdf [file pone.0280807.s001.pdf]

| OGL Specimen ID | Sample ID | Taxa                    | Treatment  | Yield (µg) | Total Normalized Yield (µg DNA/mg tissue) | nY (µg DNA/mg tissue) | %R    | COI PCR Amplification Success |
|-----------------|-----------|-------------------------|------------|------------|-------------------------------------------|-----------------------|-------|-------------------------------|
| S32141          | MDW11     | <i>Aliitta virens</i>   | Fresh      | 1.62       | 0.066942149                               | 0.019132066           | 28.58 | Yes                           |
| S32142          | MDW12     | <i>Aliitta virens</i>   | Fresh      | 1.8        | 0.064516129                               | 0.036419355           | 56.45 | Yes                           |
| S32143          | MDW13     | <i>Aliitta virens</i>   | Fresh      | 1.76       | 0.074576271                               | 0.040099661           | 53.77 | Yes                           |
| S32144          | MDW14     | <i>Aliitta virens</i>   | Fresh      | 5.05       | 0.206122449                               | 0.111203061           | 53.95 | Yes                           |
| S32145          | MDW15     | <i>Aliitta virens</i>   | Fresh      | 4.41       | 0.161538462                               | 0.089621538           | 55.48 | Yes                           |
| S32146          | MDW16     | <i>Aliitta virens</i>   | Fresh      | 3.87       | 0.16826087                                | 0.089026826           | 52.91 | Yes                           |
| S32147          | MDW17     | <i>Aliitta virens</i>   | Fresh      | 1.63       | 0.071179039                               | 0.026072882           | 36.63 | Yes                           |
| S32148          | MDW18     | <i>Aliitta virens</i>   | Fresh      | 1.77       | 0.055140187                               | 0.025629159           | 46.48 | Yes                           |
| S32149          | MDW19     | <i>Aliitta virens</i>   | Fresh      | 1.77       | 0.073443983                               | 0.037640041           | 51.25 | Yes                           |
| S32150          | MDW20     | <i>Aliitta virens</i>   | Fresh      | 2.69       | 0.09962963                                | 0.053829889           | 54.03 | Yes                           |
| S32141          | MDW141    | <i>Aliitta virens</i>   | EDTA pH 8  | 0.22       | 0.011340281                               | 0.000628014           | 8.05  | Yes                           |
| S32142          | MDW142    | <i>Aliitta virens</i>   | EDTA pH 8  | 0.7        | 0.031944444                               | 0.0008                | 3.2   | Yes                           |
| S32143          | MDW143    | <i>Aliitta virens</i>   | EDTA pH 8  | 0.215      | 0.009250531                               | 0.0010105             | 10.81 | Yes                           |
| S32144          | MDW144    | <i>Aliitta virens</i>   | EDTA pH 8  | 0.335      | 0.016600298                               | 0.000635383           | 5.69  | Yes                           |
| S32145          | MDW145    | <i>Aliitta virens</i>   | EDTA pH 8  | 1.06       | 0.04319507                                | 0.000795              | 2.31  | Yes                           |
| S32146          | MDW146    | <i>Aliitta virens</i>   | EDTA pH 8  | 0.188      | 0.008309029                               | 0.000406266           | 6.98  | Yes                           |
| S32147          | MDW147    | <i>Aliitta virens</i>   | EDTA pH 8  | 0.178      | 0.00498025                                | 0.001222388           | 13.46 | Yes                           |
| S32148          | MDW148    | <i>Aliitta virens</i>   | EDTA pH 8  | 0.251      | 0.00866905                                | 0.000494331           | 7.09  | Yes                           |
| S32149          | MDW149    | <i>Aliitta virens</i>   | EDTA pH 8  | 0.407      | 0.015417131                               | 0.000792177           | 7.26  | No                            |
| S32150          | MDW150    | <i>Aliitta virens</i>   | EDTA pH 8  | 0.361      | 0.012482427                               | 0.000429113           | 4.41  | Yes                           |
| S32141          | MDW151    | <i>Aliitta virens</i>   | EDTA pH 9  | 0.535      | 0.012680483                               | 0.00077329            | 5.03  | Yes                           |
| S32142          | MDW152    | <i>Aliitta virens</i>   | EDTA pH 9  | 4.92       | 0.145215927                               | 0.017605522           | 9.59  | Yes                           |
| S32143          | MDW153    | <i>Aliitta virens</i>   | EDTA pH 9  | 2.64       | 0.062460322                               | 0.013122353           | 16.9  | Yes                           |
| S32144          | MDW154    | <i>Aliitta virens</i>   | EDTA pH 9  | 2.75       | 0.090224275                               | 0.011474702           | 14.02 | Yes                           |
| S32145          | MDW155    | <i>Aliitta virens</i>   | EDTA pH 9  | 2.27       | 0.034733278                               | 0.003843867           | 5.08  | Yes                           |
| S32146          | MDW156    | <i>Aliitta virens</i>   | EDTA pH 9  | 0.549      | 0.00976048                                | 0.002173988           | 16.79 | Yes                           |
| S32147          | MDW157    | <i>Aliitta virens</i>   | EDTA pH 9  | 1.29       | 0.043152807                               | 0.001604478           | 2.5   | Yes                           |
| S32148          | MDW158    | <i>Aliitta virens</i>   | EDTA pH 9  | 1.39       | 0.038798443                               | 0.001579746           | 3.58  | Yes                           |
| S32149          | MDW159    | <i>Aliitta virens</i>   | EDTA pH 9  | 1.53       | 0.024705118                               | 0.001516657           | 3.41  | Yes                           |
| S32150          | MDW160    | <i>Aliitta virens</i>   | EDTA pH 9  | 2.13       | 0.104331102                               | 0.003042857           | 2.8   | Yes                           |
| S32141          | MDW161    | <i>Aliitta virens</i>   | EDTA pH 10 | 4.13       | 0.108305012                               | 0.067514466           | 42.83 | Yes                           |
| S32142          | MDW162    | <i>Aliitta virens</i>   | EDTA pH 10 | 4.55       | 0.108224016                               | 0.066973214           | 57.7  | Yes                           |
| S32143          | MDW163    | <i>Aliitta virens</i>   | EDTA pH 10 | 3.25       | 0.119399804                               | 0.090217347           | 68.01 | Yes                           |
| S32144          | MDW164    | <i>Aliitta virens</i>   | EDTA pH 10 | 1.64       | 0.095740249                               | 0.053871713           | 82.45 | Yes                           |
| S32145          | MDW165    | <i>Aliitta virens</i>   | EDTA pH 10 | 3.86       | 0.205855536                               | 0.10253125            | 72.25 | Yes                           |
| S32146          | MDW166    | <i>Aliitta virens</i>   | EDTA pH 10 | 1.74       | 0.077137168                               | 0.041506025           | 76.81 | Yes                           |
| S32147          | MDW167    | <i>Aliitta virens</i>   | EDTA pH 10 | 1.17       | 0.045703436                               | 0.017823448           | 39.76 | Yes                           |
| S32148          | MDW168    | <i>Aliitta virens</i>   | EDTA pH 10 | 3.03       | 0.115890755                               | 0.072116322           | 62.12 | Yes                           |
| S32149          | MDW169    | <i>Aliitta virens</i>   | EDTA pH 10 | 2.2        | 0.127484909                               | 0.047728638           | 46.21 | Yes                           |
| S32150          | MDW170    | <i>Aliitta virens</i>   | EDTA pH 10 | 5.83       | 0.227048212                               | 0.150643454           | 64.34 | Yes                           |
| S32141          | MDW171    | <i>Aliitta virens</i>   | 95% EtOH   | 11.1       | 0.458233156                               | 0.020161224           | 3.56  | Yes                           |
| S32142          | MDW172    | <i>Aliitta virens</i>   | 95% EtOH   | 9.19       | 0.30436262                                | 0.019287167           | 4.89  | Yes                           |
| S32143          | MDW173    | <i>Aliitta virens</i>   | 95% EtOH   | 7.23       | 0.173055384                               | 0.003831672           | 1.68  | Yes                           |
| S32144          | MDW174    | <i>Aliitta virens</i>   | 95% EtOH   | 9.07       | 0.229179013                               | 0.013619772           | 4.61  | Yes                           |
| S32145          | MDW175    | <i>Aliitta virens</i>   | 95% EtOH   | 2.1        | 0.058393892                               | 0.002178652           | 2.77  | Yes                           |
| S32146          | MDW176    | <i>Aliitta virens</i>   | 95% EtOH   | 6.92       | 0.223527085                               | 0.058329957           | 19.64 | Yes                           |
| S32147          | MDW177    | <i>Aliitta virens</i>   | 95% EtOH   | 2.6        | 0.093596488                               | 0.008160396           | 6.34  | Yes                           |
| S32148          | MDW178    | <i>Aliitta virens</i>   | 95% EtOH   | 2.64       | 0.091182091                               | 0.002181818           | 2     | Yes                           |
| S32149          | MDW179    | <i>Aliitta virens</i>   | 95% EtOH   | 2.18       | 0.073774973                               | 0.003370756           | 3.68  | Yes                           |
| S32150          | MDW180    | <i>Aliitta virens</i>   | 95% EtOH   | 4.77       | 0.165234375                               | 0.01413               | 6.28  | Yes                           |
| S32131          | MDC11     | <i>Faxonius virilis</i> | Fresh      | 0.275      | 0.01108871                                | 0.003764617           | 33.95 | Yes                           |
| S32132          | MDC12     | <i>Faxonius virilis</i> | Fresh      | 0.23       | 0.010454545                               | 0.005044318           | 48.25 | Yes                           |
| S32133          | MDC13     | <i>Faxonius virilis</i> | Fresh      | 0.33       | 0.012313433                               | 0.00435403            | 35.36 | Yes                           |

| OGL Specimen ID | Sample ID | Taxa                      | Treatment  | Yield (µg) | Total Normalized Yield (µg DNA/mg tissue) | nY (µg DNA/mg tissue) | %R    | COI | PCR Amplification Success |
|-----------------|-----------|---------------------------|------------|------------|-------------------------------------------|-----------------------|-------|-----|---------------------------|
| S32134          | MDC14     | <i>Faxonius virilis</i>   | Fresh      | 0.33       | 0.012359551                               | 0.003400112           | 27.51 | Yes |                           |
| S32135          | MDC15     | <i>Faxonius virilis</i>   | Fresh      | 0.361      | 0.016116071                               | 0.006617259           | 41.06 | Yes |                           |
| S32136          | MDC16     | <i>Faxonius virilis</i>   | Fresh      | 0.261      | 0.009255319                               | 0.003346723           | 36.16 | Yes |                           |
| S32137          | MDC17     | <i>Faxonius virilis</i>   | Fresh      | 0.334      | 0.012234432                               | 0.0057563             | 47.05 | Yes |                           |
| S32138          | MDC18     | <i>Faxonius virilis</i>   | Fresh      | 0.345      | 0.012873134                               | 0.005523862           | 42.91 | Yes |                           |
| S32139          | MDC19     | <i>Faxonius virilis</i>   | Fresh      | 0.635      | 0.02387218                                | 0.010482274           | 43.91 | Yes |                           |
| S32140          | MDC20     | <i>Faxonius virilis</i>   | Fresh      | 0.458      | 0.01647482                                | 0.007835424           | 47.56 | Yes |                           |
| S32131          | MDC141    | <i>Faxonius virilis</i>   | EDTA pH 8  | 3.4        | 0.066644929                               | 0.033807774           | 28.14 | Yes |                           |
| S32132          | MDC142    | <i>Faxonius virilis</i>   | EDTA pH 8  | 1.88       | 0.043966591                               | 0.031157867           | 37.29 | Yes |                           |
| S32133          | MDC143    | <i>Faxonius virilis</i>   | EDTA pH 8  | 3.93       | 0.095003149                               | 0.055607054           | 34.1  | Yes |                           |
| S32134          | MDC144    | <i>Faxonius virilis</i>   | EDTA pH 8  | n/a        | n/a                                       | n/a                   | n/a   | n/a |                           |
| S32135          | MDC145    | <i>Faxonius virilis</i>   | EDTA pH 8  | 3.92       | 0.050200848                               | 0.059792099           | 49.42 | Yes |                           |
| S32136          | MDC146    | <i>Faxonius virilis</i>   | EDTA pH 8  | n/a        | n/a                                       | n/a                   | n/a   | n/a |                           |
| S32137          | MDC147    | <i>Faxonius virilis</i>   | EDTA pH 8  | 0.802      | 0.009639423                               | 0.002408498           | 9.64  | Yes |                           |
| S32138          | MDC148    | <i>Faxonius virilis</i>   | EDTA pH 8  | 2.11       | 0.024823529                               | 0.014670872           | 20.72 | Yes |                           |
| S32139          | MDC149    | <i>Faxonius virilis</i>   | EDTA pH 8  | 4.41       | 0.048891353                               | 0.051114234           | 41.61 | Yes |                           |
| S32140          | MDC150    | <i>Faxonius virilis</i>   | EDTA pH 8  | 3.64       | 0.040088106                               | 0.030571667           | 28.22 | Yes |                           |
| S32131          | MDC151    | <i>Faxonius virilis</i>   | EDTA pH 9  | 1.94       | 0.044067659                               | 0.056077906           | 80.07 | Yes |                           |
| S32132          | MDC152    | <i>Faxonius virilis</i>   | EDTA pH 9  | 1.17       | 0.026323757                               | 0.025861453           | 63.88 | Yes |                           |
| S32133          | MDC153    | <i>Faxonius virilis</i>   | EDTA pH 9  | 4.45       | 0.112805041                               | 0.120117986           | 75.04 | Yes |                           |
| S32134          | MDC154    | <i>Faxonius virilis</i>   | EDTA pH 9  | 3.39       | 0.041140777                               | 0.071632583           | 76.07 | Yes |                           |
| S32135          | MDC155    | <i>Faxonius virilis</i>   | EDTA pH 9  | 0.528      | 0.013640832                               | 0.015070957           | 65.65 | Yes |                           |
| S32136          | MDC156    | <i>Faxonius virilis</i>   | EDTA pH 9  | 1.59       | 0.018047673                               | 0.024172203           | 34.51 | Yes |                           |
| S32137          | MDC157    | <i>Faxonius virilis</i>   | EDTA pH 9  | 0.661      | 0.015293892                               | 0.021197274           | 70.23 | Yes |                           |
| S32138          | MDC158    | <i>Faxonius virilis</i>   | EDTA pH 9  | 1.93       | 0.034123674                               | 0.043330854           | 73.64 | Yes |                           |
| S32139          | MDC159    | <i>Faxonius virilis</i>   | EDTA pH 9  | 0.987      | 0.014877668                               | 0.0193452             | 67.62 | Yes |                           |
| S32140          | MDC160    | <i>Faxonius virilis</i>   | EDTA pH 9  | 1.2        | 0.020291927                               | 0.021224199           | 49.7  | Yes |                           |
| S32131          | MDC161    | <i>Faxonius virilis</i>   | EDTA pH 10 | 0.556      | 0.01764992                                | 0.017075196           | 62.65 | Yes |                           |
| S32132          | MDC162    | <i>Faxonius virilis</i>   | EDTA pH 10 | 0.565      | 0.021565143                               | 0.014965542           | 53.77 | Yes |                           |
| S32133          | MDC163    | <i>Faxonius virilis</i>   | EDTA pH 10 | 0.534      | 0.020313813                               | 0.010795459           | 52.36 | Yes |                           |
| S32134          | MDC164    | <i>Faxonius virilis</i>   | EDTA pH 10 | 0.77       | 0.008369565                               | 0.014483558           | 61.32 | Yes |                           |
| S32135          | MDC165    | <i>Faxonius virilis</i>   | EDTA pH 10 | 2.65       | 0.040807255                               | 0.054441385           | 60.81 | Yes |                           |
| S32136          | MDC166    | <i>Faxonius virilis</i>   | EDTA pH 10 | 2.42       | 0.064060601                               | 0.086954732           | 73.66 | Yes |                           |
| S32137          | MDC167    | <i>Faxonius virilis</i>   | EDTA pH 10 | 0.726      | 0.011931102                               | 0.013437849           | 58.86 | Yes |                           |
| S32138          | MDC168    | <i>Faxonius virilis</i>   | EDTA pH 10 | 1.79       | 0.044516196                               | 0.032559483           | 63.3  | Yes |                           |
| S32139          | MDC169    | <i>Faxonius virilis</i>   | EDTA pH 10 | 0.324      | 0.008483196                               | 0.005700183           | 46.27 | Yes |                           |
| S32140          | MDC170    | <i>Faxonius virilis</i>   | EDTA pH 10 | 1.47       | 0.034831798                               | 0.038794141           | 78.38 | Yes |                           |
| S32131          | MDC171    | <i>Faxonius virilis</i>   | 95% EtOH   | 3.23       | 0.082329029                               | 0.042939275           | 34.83 | Yes |                           |
| S32132          | MDC172    | <i>Faxonius virilis</i>   | 95% EtOH   | 4.45       | 0.120150173                               | 0.022832243           | 10.98 | No  |                           |
| S32133          | MDC173    | <i>Faxonius virilis</i>   | 95% EtOH   | 1.78       | 0.049883898                               | 0.031309082           | 36.41 | Yes |                           |
| S32134          | MDC174    | <i>Faxonius virilis</i>   | 95% EtOH   | 0.298      | 0.007341038                               | 0.001700556           | 14.78 | Yes |                           |
| S32135          | MDC175    | <i>Faxonius virilis</i>   | 95% EtOH   | 6.99       | 0.137032481                               | 0.032941964           | 12.96 | Yes |                           |
| S32136          | MDC176    | <i>Faxonius virilis</i>   | 95% EtOH   | 5.92       | 0.115892992                               | 0.080784605           | 39.71 | Yes |                           |
| S32137          | MDC177    | <i>Faxonius virilis</i>   | 95% EtOH   | 1.14       | 0.03254468                                | 0.036054066           | 57.56 | Yes |                           |
| S32138          | MDC178    | <i>Faxonius virilis</i>   | 95% EtOH   | 1.31       | 0.032621016                               | 0.033800472           | 54.7  | Yes |                           |
| S32139          | MDC179    | <i>Faxonius virilis</i>   | 95% EtOH   | 4.38       | 0.097026932                               | 0.067844938           | 37.64 | Yes |                           |
| S32140          | MDC180    | <i>Faxonius virilis</i>   | 95% EtOH   | 6.93       | 0.182634548                               | 0.061210286           | 21.64 | Yes |                           |
| S32111          | LSL1      | <i>Homarus americanus</i> | Fresh      | 0.296      | 0.01034965                                | 0.000198493           | 19.05 | Yes |                           |
| S32112          | LSL2      | <i>Homarus americanus</i> | Fresh      | 1.36       | 0.062100457                               | 0.000218284           | 9.98  | Yes |                           |
| S32113          | LSL3      | <i>Homarus americanus</i> | Fresh      | 0.849      | 0.034096386                               | 0.000180241           | 9.35  | Yes |                           |
| S32114          | LSL4      | <i>Homarus americanus</i> | Fresh      | 0.623      | 0.023246269                               | 0.001414209           | 26.32 | Yes |                           |
| S32115          | LSL5      | <i>Homarus americanus</i> | Fresh      | 0.584      | 0.024232365                               | 0.003932573           | 42.5  | Yes |                           |
| S32116          | LSL6      | <i>Homarus americanus</i> | Fresh      | 0.592      | 0.023399209                               | 0.003369273           | 40.02 | Yes |                           |

| OGL Specimen ID | Sample ID | Taxa                           | Treatment  | Yield (µg) | Total Normalized Yield (µg DNA/mg tissue) | nY (µg DNA/mg tissue) | %R    | COI | PCR Amplification Success |
|-----------------|-----------|--------------------------------|------------|------------|-------------------------------------------|-----------------------|-------|-----|---------------------------|
| S32117          | LSL7      | <i>Homarus americanus</i>      | Fresh      | 0.906      | 0.033932584                               | 0.003616247           | 33.18 | Yes |                           |
| S32118          | LSL8      | <i>Homarus americanus</i>      | Fresh      | 0.971      | 0.034432624                               | 0.00491834            | 39.18 | Yes |                           |
| S32119          | LSL9      | <i>Homarus americanus</i>      | Fresh      | 0.347      | 0.012664234                               | 0.00028212            | 20.45 | Yes |                           |
| S32120          | LSL10     | <i>Homarus americanus</i>      | Fresh      | 0.383      | 0.016872247                               | 0.000435716           | 19.47 | Yes |                           |
| S32111          | LSL131    | <i>Homarus americanus</i>      | EDTA pH 8  | 0.519      | 0.02595                                   | 0.00514761            | 51.22 | Yes |                           |
| S32112          | LSL132    | <i>Homarus americanus</i>      | EDTA pH 8  | 0.23       | 0.008070175                               | 0.0000216             | 13.5  | Yes |                           |
| S32113          | LSL133    | <i>Homarus americanus</i>      | EDTA pH 8  | 0.969      | 0.042687225                               | 1.83048E-05           | 3.92  | Yes |                           |
| S32114          | LSL134    | <i>Homarus americanus</i>      | EDTA pH 8  | 0.82       | 0.03071161                                | 0.000180178           | 8.14  | Yes |                           |
| S32115          | LSL135    | <i>Homarus americanus</i>      | EDTA pH 8  | 0.924      | 0.033478261                               | 0.006766435           | 47.52 | Yes |                           |
| S32116          | LSL136    | <i>Homarus americanus</i>      | EDTA pH 8  | 1.02       | 0.045333333                               | 0.0198536             | 74.7  | Yes |                           |
| S32117          | LSL137    | <i>Homarus americanus</i>      | EDTA pH 8  | 0.317      | 0.014882629                               | 0.000750473           | 23.37 | Yes |                           |
| S32118          | LSL138    | <i>Homarus americanus</i>      | EDTA pH 8  | 0.904      | 0.031280277                               | 0.007918028           | 55.14 | Yes |                           |
| S32119          | LSL139    | <i>Homarus americanus</i>      | EDTA pH 8  | 0.533      | 0.018571429                               | 5.47024E-05           | 8.82  | Yes |                           |
| S32120          | LSL140    | <i>Homarus americanus</i>      | EDTA pH 8  | 0.497      | 0.017877698                               | 0.000101364           | 11.84 | Yes |                           |
| S32111          | LSL141    | <i>Homarus americanus</i>      | EDTA pH 9  | 0.217      | 0.009079498                               | 0.001564117           | 52.8  | Yes |                           |
| S32112          | LSL142    | <i>Homarus americanus</i>      | EDTA pH 9  | 0.475      | 0.017723881                               | 4.57619E-05           | 6.89  | Yes |                           |
| S32113          | LSL143    | <i>Homarus americanus</i>      | EDTA pH 9  | 0.594      | 0.023023256                               | 0.000141996           | 8.62  | Yes |                           |
| S32114          | LSL144    | <i>Homarus americanus</i>      | EDTA pH 9  | 1.03       | 0.039463602                               | 0.012243579           | 58.42 | Yes |                           |
| S32115          | LSL145    | <i>Homarus americanus</i>      | EDTA pH 9  | 0.26       | 0.009219858                               | 7.48227E-05           | 16.88 | Yes |                           |
| S32116          | LSL146    | <i>Homarus americanus</i>      | EDTA pH 9  | 0.257      | 0.010239044                               | 0.003684538           | 65.59 | Yes |                           |
| S32117          | LSL147    | <i>Homarus americanus</i>      | EDTA pH 9  | 0.271      | 0.012318182                               | 0.002521309           | 51.36 | Yes |                           |
| S32118          | LSL148    | <i>Homarus americanus</i>      | EDTA pH 9  | 0.519      | 0.019151292                               | 0.006824756           | 69.27 | Yes |                           |
| S32119          | LSL149    | <i>Homarus americanus</i>      | EDTA pH 9  | 0.239      | 0.01201005                                | 0.000963742           | 29.46 | Yes |                           |
| S32120          | LSL150    | <i>Homarus americanus</i>      | EDTA pH 9  | 0.375      | 0.018939394                               | 0.000868169           | 23.71 | Yes |                           |
| S32111          | LSL151    | <i>Homarus americanus</i>      | EDTA pH 10 | 0.262      | 0.008675497                               | 0.000482861           | 29.76 | Yes |                           |
| S32112          | LSL152    | <i>Homarus americanus</i>      | EDTA pH 10 | 0.874      | 0.039017857                               | 0.010477938           | 59.57 | Yes |                           |
| S32113          | LSL153    | <i>Homarus americanus</i>      | EDTA pH 10 | 0.611      | 0.024736842                               | 0.009191429           | 66.97 | Yes |                           |
| S32114          | LSL154    | <i>Homarus americanus</i>      | EDTA pH 10 | 0.538      | 0.017188498                               | 0.004435137           | 60.62 | Yes |                           |
| S32115          | LSL155    | <i>Homarus americanus</i>      | EDTA pH 10 | 0.29       | 0.011983471                               | 0.002459417           | 50.87 | Yes |                           |
| S32116          | LSL156    | <i>Homarus americanus</i>      | EDTA pH 10 | 0.313      | 0.010574324                               | 0.002430456           | 53.29 | Yes |                           |
| S32117          | LSL157    | <i>Homarus americanus</i>      | EDTA pH 10 | 0.241      | 0.008426573                               | 0.001062659           | 40.74 | Yes |                           |
| S32118          | LSL158    | <i>Homarus americanus</i>      | EDTA pH 10 | 0.404      | 0.012866242                               | 0.004123701           | 64.42 | Yes |                           |
| S32119          | LSL159    | <i>Homarus americanus</i>      | EDTA pH 10 | 0.3        | 0.012448133                               | 0.00209271            | 46.27 | Yes |                           |
| S32120          | LSL160    | <i>Homarus americanus</i>      | EDTA pH 10 | 0.362      | 0.014031008                               | 0.004545767           | 64.44 | Yes |                           |
| S32111          | LSL161    | <i>Homarus americanus</i>      | 95% EtOH   | 4.37       | 0.197737557                               | 0.003377158           | 17.52 | Yes |                           |
| S32112          | LSL162    | <i>Homarus americanus</i>      | 95% EtOH   | 3.63       | 0.146370968                               | 0.004797714           | 19.41 | Yes |                           |
| S32113          | LSL163    | <i>Homarus americanus</i>      | 95% EtOH   | 1.28       | 0.050393701                               | 0.000240034           | 8.14  | Yes |                           |
| S32114          | LSL164    | <i>Homarus americanus</i>      | 95% EtOH   | 0.622      | 0.021013514                               | 0.001168919           | 27.68 | Yes |                           |
| S32115          | LSL165    | <i>Homarus americanus</i>      | 95% EtOH   | 4.01       | 0.131045752                               | 0.017313333           | 44.52 | Yes |                           |
| S32116          | LSL166    | <i>Homarus americanus</i>      | 95% EtOH   | 2.09       | 0.114835165                               | 0.000787088           | 11.46 | Yes |                           |
| S32117          | LSL167    | <i>Homarus americanus</i>      | 95% EtOH   | 1.06       | 0.034983498                               | 0.000639343           | 16.01 | Yes |                           |
| S32118          | LSL168    | <i>Homarus americanus</i>      | 95% EtOH   | 1.66       | 0.079807692                               | 0.004564423           | 47    | Yes |                           |
| S32119          | LSL169    | <i>Homarus americanus</i>      | 95% EtOH   | 1.42       | 0.04717608                                | 0.000794791           | 21.36 | Yes |                           |
| S32120          | LSL170    | <i>Homarus americanus</i>      | 95% EtOH   | 0.491      | 0.019179688                               | 0.000641305           | 19.78 | Yes |                           |
| S32101          | MDF1      | <i>Scomberomorus maculatus</i> | Fresh      | 0.817      | 0.035833333                               | 0.00259075            | 7.23  |     |                           |
| S32102          | MDF2      | <i>Scomberomorus maculatus</i> | Fresh      | 0.532      | 0.022931034                               | 0.000605379           | 2.64  | Yes |                           |
| S32103          | MDF3      | <i>Scomberomorus maculatus</i> | Fresh      | 0.534      | 0.022820513                               | 0.000844359           | 3.7   | Yes |                           |
| S32104          | MDF4      | <i>Scomberomorus maculatus</i> | Fresh      | 0.36       | 0.015450644                               | 0.000633476           | 4.1   | Yes |                           |
| S32105          | MDF5      | <i>Scomberomorus maculatus</i> | Fresh      | 0.691      | 0.029656652                               | 0.000940116           | 3.17  | Yes |                           |
| S32106          | MDF6      | <i>Scomberomorus maculatus</i> | Fresh      | 3.35       | 0.132936508                               | 0.009784127           | 7.36  | Yes |                           |
| S32107          | MDF7      | <i>Scomberomorus maculatus</i> | Fresh      | 0.398      | 0.016048387                               | 0.000908339           | 5.66  | Yes |                           |
| S32108          | MDF8      | <i>Scomberomorus maculatus</i> | Fresh      | 0.85       | 0.031135531                               | 0.001628388           | 5.23  | Yes |                           |
| S32109          | MDF9      | <i>Scomberomorus maculatus</i> | Fresh      | 0.622      | 0.025387755                               | 0.001414098           | 5.57  | Yes |                           |

| OGL Specimen ID | Sample ID | Taxa                           | Treatment  | Yield (µg) | Total Normalized Yield (µg DNA/mg tissue) | nY (µg DNA/mg tissue) | %R    | COI | PCR Amplification Success |
|-----------------|-----------|--------------------------------|------------|------------|-------------------------------------------|-----------------------|-------|-----|---------------------------|
| S32110          | MDF10     | <i>Scomberomorus maculatus</i> | Fresh      | 0.836      | 0.03512605                                | 0.002680118           | 7.63  | Yes |                           |
| S32101          | MDF131    | <i>Scomberomorus maculatus</i> | EDTA pH 8  | 0.351      | 0.026811609                               | 0.00128466            | 10.98 | Yes |                           |
| S32102          | MDF132    | <i>Scomberomorus maculatus</i> | EDTA pH 8  | 0.159      | 0.011128589                               | 0.000617549           | 11.38 | Yes |                           |
| S32103          | MDF133    | <i>Scomberomorus maculatus</i> | EDTA pH 8  | 0.265      | 0.018617793                               | 0.001101713           | 17.96 | Yes |                           |
| S32104          | MDF134    | <i>Scomberomorus maculatus</i> | EDTA pH 8  | 0.271      | 0.025468197                               | 0.001075704           | 11.67 | Yes |                           |
| S32105          | MDF135    | <i>Scomberomorus maculatus</i> | EDTA pH 8  | 0.186      | 0.011030996                               | 0.000999925           | 14.3  | Yes |                           |
| S32106          | MDF136    | <i>Scomberomorus maculatus</i> | EDTA pH 8  | 0.224      | 0.013214298                               | 0.000788506           | 12.25 | Yes |                           |
| S32107          | MDF137    | <i>Scomberomorus maculatus</i> | EDTA pH 8  | 0.228      | 0.016080367                               | 0.000924451           | 11.88 | Yes |                           |
| S32108          | MDF138    | <i>Scomberomorus maculatus</i> | EDTA pH 8  | 0.698      | 0.07088821                                | 0.003309765           | 10.1  | Yes |                           |
| S32109          | MDF139    | <i>Scomberomorus maculatus</i> | EDTA pH 8  | 0.313      | 0.019088476                               | 0.001200506           | 11.89 | Yes |                           |
| S32110          | MDF140    | <i>Scomberomorus maculatus</i> | EDTA pH 8  | 0.406      | 0.043381702                               | 0.002707282           | 14.67 | Yes |                           |
| S32101          | MDF141    | <i>Scomberomorus maculatus</i> | EDTA pH 9  | 0.268      | 0.023894463                               | 0.00149573            | 12.39 | Yes |                           |
| S32102          | MDF142    | <i>Scomberomorus maculatus</i> | EDTA pH 9  | 0.113      | 0.006636745                               | 0.000190663           | 4.91  | Yes |                           |
| S32103          | MDF143    | <i>Scomberomorus maculatus</i> | EDTA pH 9  | 0.165      | 0.011286645                               | 0.001077068           | 20.04 | Yes |                           |
| S32104          | MDF144    | <i>Scomberomorus maculatus</i> | EDTA pH 9  | 0.539      | 0.036865006                               | 0.002821598           | 14.71 | Yes |                           |
| S32105          | MDF145    | <i>Scomberomorus maculatus</i> | EDTA pH 9  | 0.346      | 0.018659156                               | 0.001572826           | 14.41 | Yes |                           |
| S32106          | MDF146    | <i>Scomberomorus maculatus</i> | EDTA pH 9  | 0.459      | 0.031092555                               | 0.001539367           | 9.86  | Yes |                           |
| S32107          | MDF147    | <i>Scomberomorus maculatus</i> | EDTA pH 9  | 0.448      | 0.018637363                               | 0.001192814           | 10.73 | Yes |                           |
| S32108          | MDF148    | <i>Scomberomorus maculatus</i> | EDTA pH 9  | 0.767      | 0.052824414                               | 0.00525163            | 19.24 | Yes |                           |
| S32109          | MDF149    | <i>Scomberomorus maculatus</i> | EDTA pH 9  | 0.484      | 0.030419169                               | 0.002239352           | 13.14 | Yes |                           |
| S32110          | MDF150    | <i>Scomberomorus maculatus</i> | EDTA pH 9  | 1.26       | 0.07428198                                | 0.008484241           | 23.5  | Yes |                           |
| S32101          | MDF151    | <i>Scomberomorus maculatus</i> | EDTA pH 10 | 0.807      | 0.064941824                               | 0.00606663            | 19.32 | Yes |                           |
| S32102          | MDF152    | <i>Scomberomorus maculatus</i> | EDTA pH 10 | 0.61       | 0.041012031                               | 0.003456667           | 14.96 | Yes |                           |
| S32103          | MDF153    | <i>Scomberomorus maculatus</i> | EDTA pH 10 | 1.06       | 0.047620399                               | 0.008183102           | 33.35 | Yes |                           |
| S32104          | MDF154    | <i>Scomberomorus maculatus</i> | EDTA pH 10 | 0.66       | 0.051097396                               | 0.008496906           | 35.79 | Yes |                           |
| S32105          | MDF155    | <i>Scomberomorus maculatus</i> | EDTA pH 10 | 0.851      | 0.054084765                               | 0.008367195           | 28.71 | Yes |                           |
| S32106          | MDF156    | <i>Scomberomorus maculatus</i> | EDTA pH 10 | 0.614      | 0.040349817                               | 0.005380272           | 27.69 | Yes |                           |
| S32107          | MDF157    | <i>Scomberomorus maculatus</i> | EDTA pH 10 | 0.416      | 0.024546265                               | 0.002192789           | 14.97 | Yes |                           |
| S32108          | MDF158    | <i>Scomberomorus maculatus</i> | EDTA pH 10 | 0.678      | 0.048836343                               | 0.005363611           | 19.54 | Yes |                           |
| S32109          | MDF159    | <i>Scomberomorus maculatus</i> | EDTA pH 10 | 0.445      | 0.035449498                               | 0.003437725           | 17.15 | Yes |                           |
| S32110          | MDF160    | <i>Scomberomorus maculatus</i> | EDTA pH 10 | 0.383      | 0.039170568                               | 0.003706824           | 19.26 | Yes |                           |
| S32101          | MDF161    | <i>Scomberomorus maculatus</i> | 95% EtOH   | 0.409      | 0.012200379                               | 0.001957502           | 9.62  | Yes |                           |
| S32102          | MDF162    | <i>Scomberomorus maculatus</i> | 95% EtOH   | 0.535      | 0.013525281                               | 0.001192604           | 5.35  | Yes |                           |
| S32103          | MDF163    | <i>Scomberomorus maculatus</i> | 95% EtOH   | 0.479      | 0.012613128                               | 0.001128413           | 4.9   | Yes |                           |
| S32104          | MDF164    | <i>Scomberomorus maculatus</i> | 95% EtOH   | 0.72       | 0.011944551                               | 0.001875918           | 7.66  | No  |                           |
| S32105          | MDF165    | <i>Scomberomorus maculatus</i> | 95% EtOH   | 0.574      | 0.012260325                               | 0.001166442           | 5.06  | Yes |                           |
| S32106          | MDF166    | <i>Scomberomorus maculatus</i> | 95% EtOH   | 0.356      | 0.010377229                               | 0.000941093           | 5.71  | No  |                           |
| S32107          | MDF167    | <i>Scomberomorus maculatus</i> | 95% EtOH   | 0.331      | 0.00790982                                | 0.000864278           | 6.11  | No  |                           |
| S32108          | MDF168    | <i>Scomberomorus maculatus</i> | 95% EtOH   | 0.501      | 0.01379851                                | 0.002876277           | 12.86 | Yes |                           |
| S32109          | MDF169    | <i>Scomberomorus maculatus</i> | 95% EtOH   | 0.671      | 0.018846407                               | 0.006448663           | 18.26 | Yes |                           |
| S32110          | MDF170    | <i>Scomberomorus maculatus</i> | 95% EtOH   | 0.255      | 0.005530542                               | 0.002986213           | 27.52 | Yes |                           |
| S32121          | LSCL1     | <i>Mercenaria mercenaria</i>   | Fresh      | 9.22       | 0.364426877                               | 0.252146957           | 69.19 | Yes |                           |
| S32122          | LSCL2     | <i>Mercenaria mercenaria</i>   | Fresh      | 8.9        | 0.096529284                               | 0.055456074           | 57.45 | Yes |                           |
| S32123          | LSCL3     | <i>Mercenaria mercenaria</i>   | Fresh      | 7.33       | 0.313247863                               | 0.154838419           | 49.43 | Yes |                           |
| S32124          | LSCL4     | <i>Mercenaria mercenaria</i>   | Fresh      | 11.7       | 0.481481481                               | 0.232892593           | 48.37 | Yes |                           |
| S32125          | LSCL5     | <i>Mercenaria mercenaria</i>   | Fresh      | 8.83       | 0.314234875                               | 0.183544591           | 58.41 | Yes |                           |
| S32126          | LSCL6     | <i>Mercenaria mercenaria</i>   | Fresh      | 3.14       | 0.118045113                               | 0.031600677           | 26.77 | Yes |                           |
| S32127          | LSCL7     | <i>Mercenaria mercenaria</i>   | Fresh      | 4.28       | 0.157352941                               | 0.092004265           | 58.47 | Yes |                           |
| S32128          | LSCL8     | <i>Mercenaria mercenaria</i>   | Fresh      | 2.83       | 0.088993711                               | 0.040545535           | 45.56 | Yes |                           |
| S32129          | LSCL9     | <i>Mercenaria mercenaria</i>   | Fresh      | 11.2       | 0.405797101                               | 0.196446377           | 48.41 | Yes |                           |
| S32130          | LSCL10    | <i>Mercenaria mercenaria</i>   | Fresh      | 6.46       | 0.262601626                               | 0.166620732           | 63.45 | Yes |                           |
| S32121          | LSCL131   | <i>Mercenaria mercenaria</i>   | EDTA pH 8  | 3.23       | 0.110447038                               | 0.084320717           | 61.87 | Yes |                           |
| S32122          | LSCL132   | <i>Mercenaria mercenaria</i>   | EDTA pH 8  | 3.13       | 0.107494087                               | 0.104096419           | 76.16 | Yes |                           |

| OGL Specimen ID | Sample ID | Taxa                         | Treatment  | Yield (µg) | Total Normalized Yield (µg DNA/mg tissue) | nY (µg DNA/mg tissue) | %R    | COI PCR Amplification Success |
|-----------------|-----------|------------------------------|------------|------------|-------------------------------------------|-----------------------|-------|-------------------------------|
| S32123          | LSCL133   | <i>Mercenaria mercenaria</i> | EDTA pH 8  | 4.13       | 0.137170161                               | 0.144768252           | 86.23 | Yes                           |
| S32124          | LSCL134   | <i>Mercenaria mercenaria</i> | EDTA pH 8  | 7.91       | 0.360758401                               | 0.274100333           | 72.77 | Yes                           |
| S32125          | LSCL135   | <i>Mercenaria mercenaria</i> | EDTA pH 8  | 6.44       | 0.290783055                               | 0.238782634           | 76.01 | Yes                           |
| S32126          | LSCL136   | <i>Mercenaria mercenaria</i> | EDTA pH 8  | 8.7        | 0.219448373                               | 0.215260396           | 74.97 | Yes                           |
| S32127          | LSCL137   | <i>Mercenaria mercenaria</i> | EDTA pH 8  | 8.33       | 0.332806366                               | 0.266526138           | 78.71 | Yes                           |
| S32128          | LSCL138   | <i>Mercenaria mercenaria</i> | EDTA pH 8  | 1.51       | 0.064737492                               | 0.053791211           | 79.44 | Yes                           |
| S32129          | LSCL139   | <i>Mercenaria mercenaria</i> | EDTA pH 8  | 1.7        | 0.087979497                               | 0.059688889           | 75.84 | Yes                           |
| S32130          | LSCL140   | <i>Mercenaria mercenaria</i> | EDTA pH 8  | 3.82       | 0.134568182                               | 0.0961876             | 75.54 | Yes                           |
| S32121          | LSCL141   | <i>Mercenaria mercenaria</i> | EDTA pH 9  | 3.16       | 0.120811373                               | 0.08051551            | 74.91 | Yes                           |
| S32122          | LSCL142   | <i>Mercenaria mercenaria</i> | EDTA pH 9  | 3.13       | 0.104779019                               | 0.084993398           | 70.33 | Yes                           |
| S32123          | LSCL143   | <i>Mercenaria mercenaria</i> | EDTA pH 9  | 2.64       | 0.102145166                               | 0.070646829           | 65.83 | Yes                           |
| S32124          | LSCL144   | <i>Mercenaria mercenaria</i> | EDTA pH 9  | 4.39       | 0.107746909                               | 0.1020675             | 73.47 | Yes                           |
| S32125          | LSCL145   | <i>Mercenaria mercenaria</i> | EDTA pH 9  | 6.57       | 0.196037187                               | 0.175192601           | 78.93 | Yes                           |
| S32126          | LSCL146   | <i>Mercenaria mercenaria</i> | EDTA pH 9  | 4.03       | 0.12979066                                | 0.133701176           | 84.6  | Yes                           |
| S32127          | LSCL147   | <i>Mercenaria mercenaria</i> | EDTA pH 9  | 7.05       | 0.234319792                               | 0.252680472           | 83.51 | Yes                           |
| S32128          | LSCL148   | <i>Mercenaria mercenaria</i> | EDTA pH 9  | 13.8       | 0.672740675                               | 0.29156391            | 56.2  | Yes                           |
| S32129          | LSCL149   | <i>Mercenaria mercenaria</i> | EDTA pH 9  | 3.93       | 0.209598795                               | 0.17045089            | 82.84 | Yes                           |
| S32130          | LSCL150   | <i>Mercenaria mercenaria</i> | EDTA pH 9  | 8.33       | 0.385749443                               | 0.345359431           | 87.48 | Yes                           |
| S32121          | LSCL151   | <i>Mercenaria mercenaria</i> | EDTA pH 10 | 0.892      | 0.046831497                               | 0.028015258           | 69.41 | Yes                           |
| S32122          | LSCL152   | <i>Mercenaria mercenaria</i> | EDTA pH 10 | 3.88       | 0.1753833                                 | 0.111541849           | 68.42 | Yes                           |
| S32123          | LSCL153   | <i>Mercenaria mercenaria</i> | EDTA pH 10 | 2.18       | 0.068146101                               | 0.05788058            | 73.28 | Yes                           |
| S32124          | LSCL154   | <i>Mercenaria mercenaria</i> | EDTA pH 10 | 1.24       | 0.062868953                               | 0.048608              | 76.44 | Yes                           |
| S32125          | LSCL155   | <i>Mercenaria mercenaria</i> | EDTA pH 10 | 4.79       | 0.175345877                               | 0.162899424           | 82.64 | Yes                           |
| S32126          | LSCL156   | <i>Mercenaria mercenaria</i> | EDTA pH 10 | 0.862      | 0.025133074                               | 0.026438258           | 73.61 | Yes                           |
| S32127          | LSCL157   | <i>Mercenaria mercenaria</i> | EDTA pH 10 | 2.54       | 0.115534678                               | 0.107618696           | 77.96 | Yes                           |
| S32128          | LSCL158   | <i>Mercenaria mercenaria</i> | EDTA pH 10 | 6.37       | 0.272107843                               | 0.179484118           | 76.64 | Yes                           |
| S32129          | LSCL159   | <i>Mercenaria mercenaria</i> | EDTA pH 10 | 2.54       | 0.14745035                                | 0.097507047           | 74.09 | Yes                           |
| S32130          | LSCL160   | <i>Mercenaria mercenaria</i> | EDTA pH 10 | 7.16       | 0.199160502                               | 0.218169412           | 88.06 | Yes                           |
| S32121          | LSCL161   | <i>Mercenaria mercenaria</i> | 95% EtOH   | 13.8       | 0.429054418                               | 0.390021719           | 62.46 | Yes                           |
| S32122          | LSCL162   | <i>Mercenaria mercenaria</i> | 95% EtOH   | 17.6       | 0.403835729                               | 0.465822951           | 64.58 | Yes                           |
| S32123          | LSCL163   | <i>Mercenaria mercenaria</i> | 95% EtOH   | 5.42       | 0.195287487                               | 0.158031714           | 61.23 | No                            |
| S32124          | LSCL164   | <i>Mercenaria mercenaria</i> | 95% EtOH   | 5.21       | 0.12342751                                | 0.160352222           | 74.79 | Yes                           |
| S32125          | LSCL165   | <i>Mercenaria mercenaria</i> | 95% EtOH   | 7.39       | 0.138846575                               | 0.164828007           | 63.79 | Yes                           |
| S32126          | LSCL166   | <i>Mercenaria mercenaria</i> | 95% EtOH   | 8.69       | 0.2072218                                 | 0.237012201           | 70.64 | Yes                           |
| S32127          | LSCL167   | <i>Mercenaria mercenaria</i> | 95% EtOH   | 11.7       | 0.321933962                               | 0.299445205           | 56.05 | Yes                           |
| S32128          | LSCL168   | <i>Mercenaria mercenaria</i> | 95% EtOH   | 2.17       | 0.054826026                               | 0.051237354           | 68.71 | Yes                           |
| S32129          | LSCL169   | <i>Mercenaria mercenaria</i> | 95% EtOH   | 8.26       | 0.282031583                               | 0.280995117           | 72.46 | Yes                           |
| S32130          | LSCL170   | <i>Mercenaria mercenaria</i> | 95% EtOH   | 9.65       | 0.242095554                               | 0.223026346           | 60.09 | Yes                           |
