# Supplementary material for: Greater than pH 8: The pH dependence of EDTA as a preservative of high molecular weight DNA in biological samples
Source: PubMed Central journal article supplement (PMC9870144; doi:10.1371/journal.pone.0280807), 2023-01-23
Supplement: pone.0280807.s002.pdf [file pone.0280807.s002.pdf]

| OGL Specimen ID | Sample ID | Taxa                           | Treatment  | BOLD Process ID | Species Identification of Best Match in BOLD | Sequence Identity (%) | Record ID of Best Match in BOLD |
|-----------------|-----------|--------------------------------|------------|-----------------|----------------------------------------------|-----------------------|---------------------------------|
| S32143          | MDW13     | <i>Alitta virens</i>           | Fresh      | EDTA036-21      | <i>Alitta virens</i>                         | 100                   | GBMNB36094-20                   |
| S32143          | MDW163    | <i>Alitta virens</i>           | EDTA pH 10 | EDTA037-21      | <i>Alitta virens</i>                         | 100                   | GBMNB36094-20                   |
| S32143          | MDW173    | <i>Alitta virens</i>           | 95% EtOH   | EDTA038-21      | <i>Alitta virens</i>                         | 100                   | GBMNB36094-20                   |
| S32144          | MDW14     | <i>Alitta virens</i>           | Fresh      | EDTA039-21      | <i>Alitta virens</i>                         | 100                   | GBMNB36094-20                   |
| S32144          | MDW164    | <i>Alitta virens</i>           | EDTA pH 10 | EDTA040-21      | <i>Alitta virens</i>                         | 100                   | GBMNB36094-20                   |
| S32144          | MDW174    | <i>Alitta virens</i>           | 95% EtOH   | EDTA041-21      | <i>Alitta virens</i>                         | 100                   | GBMNB36094-20                   |
| S32148          | MDW18     | <i>Alitta virens</i>           | Fresh      | EDTA044-21      | <i>Alitta virens</i>                         | 100                   | GBMNB36094-20                   |
| S32148          | MDW168    | <i>Alitta virens</i>           | EDTA pH 10 | EDTA042-21      | <i>Alitta virens</i>                         | 100                   | GBMNB36094-20                   |
| S32148          | MDW178    | <i>Alitta virens</i>           | 95% EtOH   | EDTA043-21      | <i>Alitta virens</i>                         | 100                   | GBMNB36094-20                   |
| S32131          | MDC11     | <i>Faxonius virilis</i>        | Fresh      | EDTA010-21      | <i>Orconectes virilis</i>                    | 100                   | GBFCJ080-08                     |
| S32131          | MDC161    | <i>Faxonius virilis</i>        | EDTA pH 10 | EDTA011-21      | <i>Orconectes virilis</i>                    | 100                   | GBFCJ080-08                     |
| S32131          | MDC177    | <i>Faxonius virilis</i>        | 95% EtOH   | EDTA015-21      | <i>Orconectes virilis</i>                    | 100                   | GBFCJ071-08                     |
| S32137          | MDC17     | <i>Faxonius virilis</i>        | Fresh      | EDTA014-21      | <i>Orconectes virilis</i>                    | 100                   | GBFCJ071-08                     |
| S32137          | MDC167    | <i>Faxonius virilis</i>        | EDTA pH 10 | EDTA013-21      | <i>Orconectes virilis</i>                    | 100                   | GBFCJ071-08                     |
| S32137          | MDC171    | <i>Faxonius virilis</i>        | 95% EtOH   | EDTA012-21      | <i>Orconectes virilis</i>                    | 100                   | GBFCJ080-08                     |
| S32139          | MDC19     | <i>Faxonius virilis</i>        | Fresh      | EDTA018-21      | <i>Orconectes virilis</i>                    | 100                   | GBFCJ080-08                     |
| S32139          | MDC169    | <i>Faxonius virilis</i>        | EDTA pH 10 | EDTA016-21      | <i>Orconectes virilis</i>                    | 100                   | GBFCJ080-08                     |
| S32139          | MDC179    | <i>Faxonius virilis</i>        | 95% EtOH   | EDTA017-21      | <i>Orconectes virilis</i>                    | 100                   | GBFCJ080-08                     |
| S32111          | LSL1      | <i>Homarus americanus</i>      | Fresh      | EDTA027-21      | <i>Homarus americanus</i>                    | 100                   | RBGC074-03                      |
| S32111          | LSL151    | <i>Homarus americanus</i>      | EDTA pH 10 | EDTA028-21      | <i>Homarus americanus</i>                    | 100                   | RBGC074-03                      |
| S32111          | LSL161    | <i>Homarus americanus</i>      | 95% EtOH   | EDTA029-21      | <i>Homarus americanus</i>                    | 100                   | RBGC074-03                      |
| S32115          | LSL5      | <i>Homarus americanus</i>      | Fresh      | EDTA032-21      | <i>Homarus americanus</i>                    | 100                   | GBCM21816-19                    |
| S32115          | LSL155    | <i>Homarus americanus</i>      | EDTA pH 10 | EDTA030-21      | <i>Homarus americanus</i>                    | 100                   | GBCM21816-19                    |
| S32115          | LSL165    | <i>Homarus americanus</i>      | 95% EtOH   | EDTA031-21      | <i>Homarus americanus</i>                    | 100                   | GBCM21816-19                    |
| S32117          | LSL7      | <i>Homarus americanus</i>      | Fresh      | EDTA035-21      | <i>Homarus americanus</i>                    | 100                   | GBCM21816-19                    |
| S32117          | LSL157    | <i>Homarus americanus</i>      | EDTA pH 10 | EDTA033-21      | <i>Homarus americanus</i>                    | 100                   | GBCM21816-19                    |
| S32117          | LSL167    | <i>Homarus americanus</i>      | 95% EtOH   | EDTA034-21      | <i>Homarus americanus</i>                    | 100                   | GBCM21816-19                    |
| S32106          | MDF6      | <i>Scomberomorus maculatus</i> | Fresh      | EDTA023-21      | <i>Scomberomorus maculatus</i>               | 100                   | MFIV314-10                      |
| S32106          | MDF156    | <i>Scomberomorus maculatus</i> | EDTA pH 10 | EDTA022-21      | <i>Scomberomorus maculatus</i>               | 100                   | MFIV314-10                      |
| S32106          | MDF166    | <i>Scomberomorus maculatus</i> | 95% EtOH   | n/a             | n/a                                          | n/a                   | n/a                             |
| S32109          | MDF9      | <i>Scomberomorus maculatus</i> | Fresh      | EDTA026-21      | <i>Scomberomorus maculatus</i>               | 100                   | ANGBF41754-19                   |
| S32109          | MDF159    | <i>Scomberomorus maculatus</i> | EDTA pH 10 | EDTA024-21      | <i>Scomberomorus maculatus</i>               | 100                   | ANGBF41754-19                   |
| S32109          | MDF169    | <i>Scomberomorus maculatus</i> | 95% EtOH   | EDTA025-21      | <i>Scomberomorus maculatus</i>               | 100                   | ANGBF41754-19                   |
| S32110          | MDF10     | <i>Scomberomorus maculatus</i> | Fresh      | EDTA019-21      | <i>Scomberomorus maculatus</i>               | 100                   | MFIV314-10                      |
| S32110          | MDF160    | <i>Scomberomorus maculatus</i> | EDTA pH 10 | EDTA020-21      | <i>Scomberomorus maculatus</i>               | 100                   | MFIV314-10                      |
| S32110          | MDF170    | <i>Scomberomorus maculatus</i> | 95% EtOH   | EDTA021-21      | <i>Scomberomorus maculatus</i>               | 100                   | MFIV314-10                      |
| S32121          | LSCL1     | <i>Mercenaria mercenaria</i>   | Fresh      | EDTA001-21      | <i>Mercenaria mercenaria</i>                 | 100                   | GBML10502-19                    |
| S32121          | LSCL151   | <i>Mercenaria mercenaria</i>   | EDTA pH 10 | EDTA002-21      | <i>Mercenaria mercenaria</i>                 | 100                   | GBML10502-19                    |
| S32121          | LSCL161   | <i>Mercenaria mercenaria</i>   | 95% EtOH   | EDTA003-21      | <i>Mercenaria mercenaria</i>                 | 100                   | GBML10502-19                    |
| S32124          | LSCL4     | <i>Mercenaria mercenaria</i>   | Fresh      | EDTA006-21      | <i>Mercenaria mercenaria</i>                 | 100                   | GBMLB2713-08                    |
| S32124          | LSCL154   | <i>Mercenaria mercenaria</i>   | EDTA pH 10 | EDTA004-21      | <i>Mercenaria mercenaria</i>                 | 100                   | GBMLB2713-08                    |
| S32124          | LSCL164   | <i>Mercenaria mercenaria</i>   | 95% EtOH   | EDTA005-21      | <i>Mercenaria mercenaria</i>                 | 100                   | GBMLB2713-08                    |
| S32126          | LSCL6     | <i>Mercenaria mercenaria</i>   | Fresh      | EDTA009-21      | <i>Mercenaria mercenaria</i>                 | 100                   | GBML10502-19                    |
| S32126          | LSCL156   | <i>Mercenaria mercenaria</i>   | EDTA pH 10 | EDTA007-21      | <i>Mercenaria mercenaria</i>                 | 100                   | GBML10502-19                    |
| S32126          | LSCL166   | <i>Mercenaria mercenaria</i>   | 95% EtOH   | EDTA008-21      | <i>Mercenaria mercenaria</i>                 | 100                   | GBML10502-19                    |
