# Supplementary material for: Greater than pH 8: The pH dependence of EDTA as a preservative of high molecular weight DNA in biological samples
Source: PubMed Central journal article supplement (PMC9870144; doi:10.1371/journal.pone.0280807), 2023-01-23

(a)

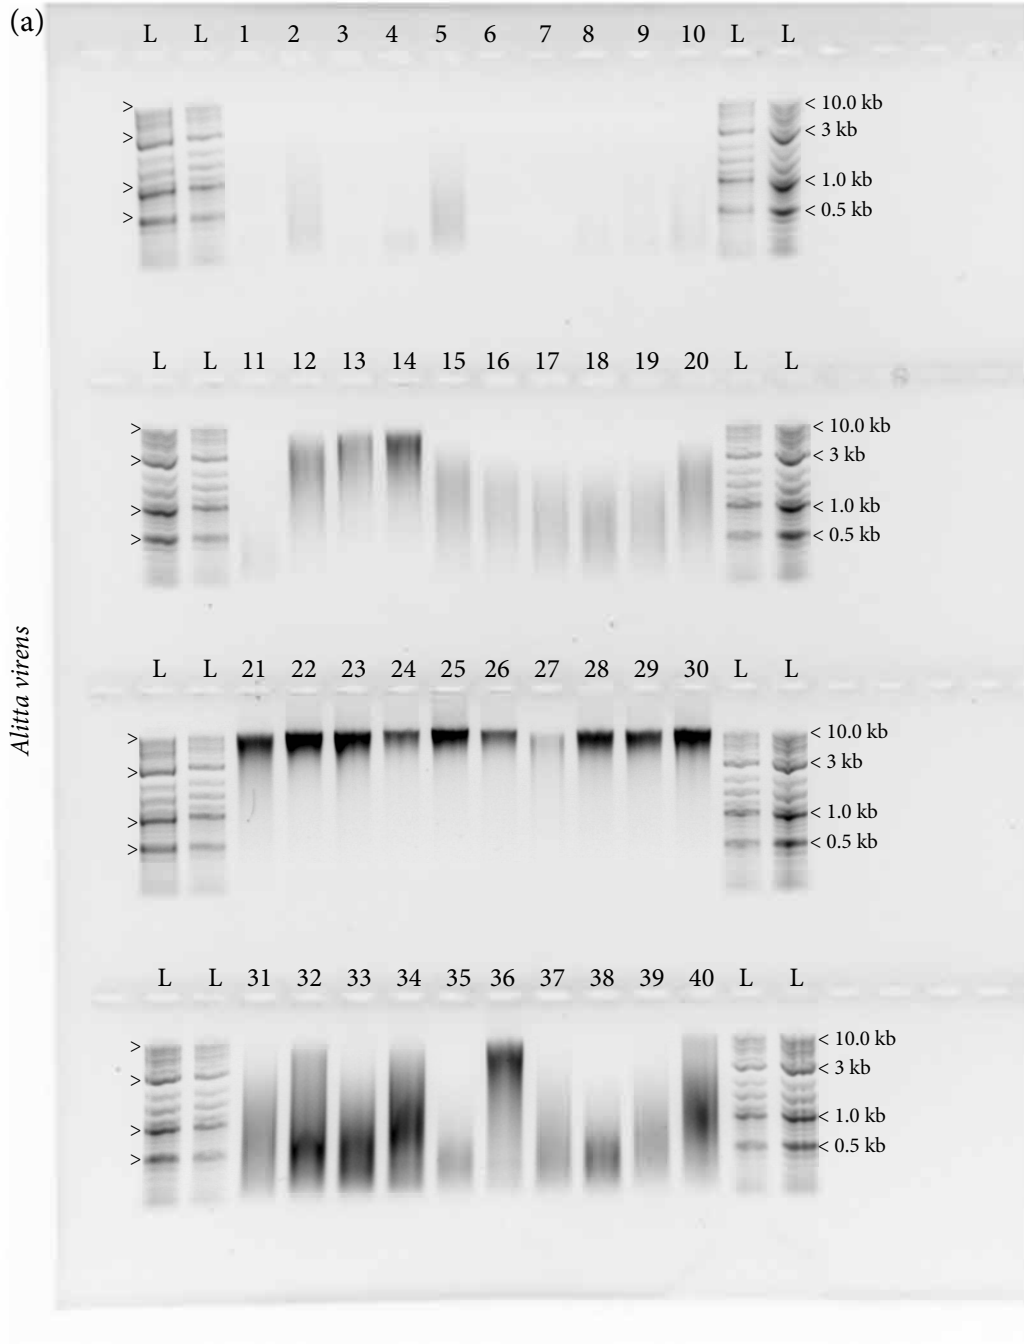

X X X X X X X X X X X X X X

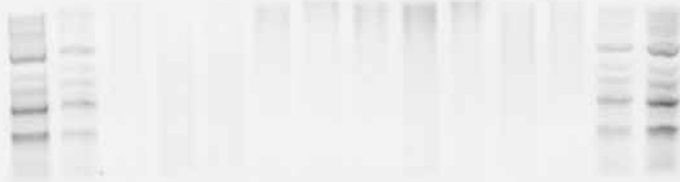

(e)  
*Mercenaria mercenaria*

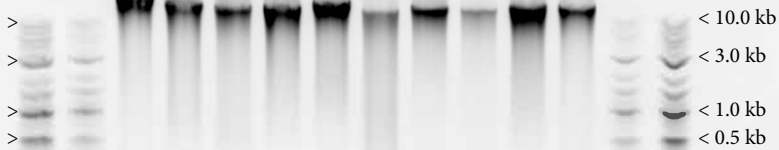

X X X X X X X X X X X X X X

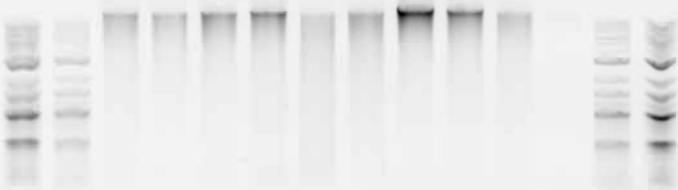

(a)

L L 41 42 43 44 45 46 47 48 49 50 L L

*Alitta virens*

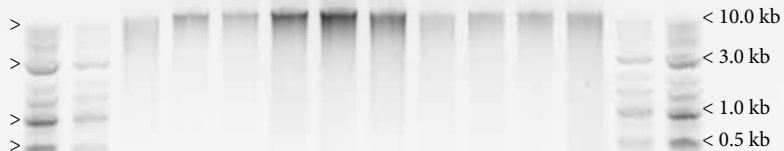

(b)

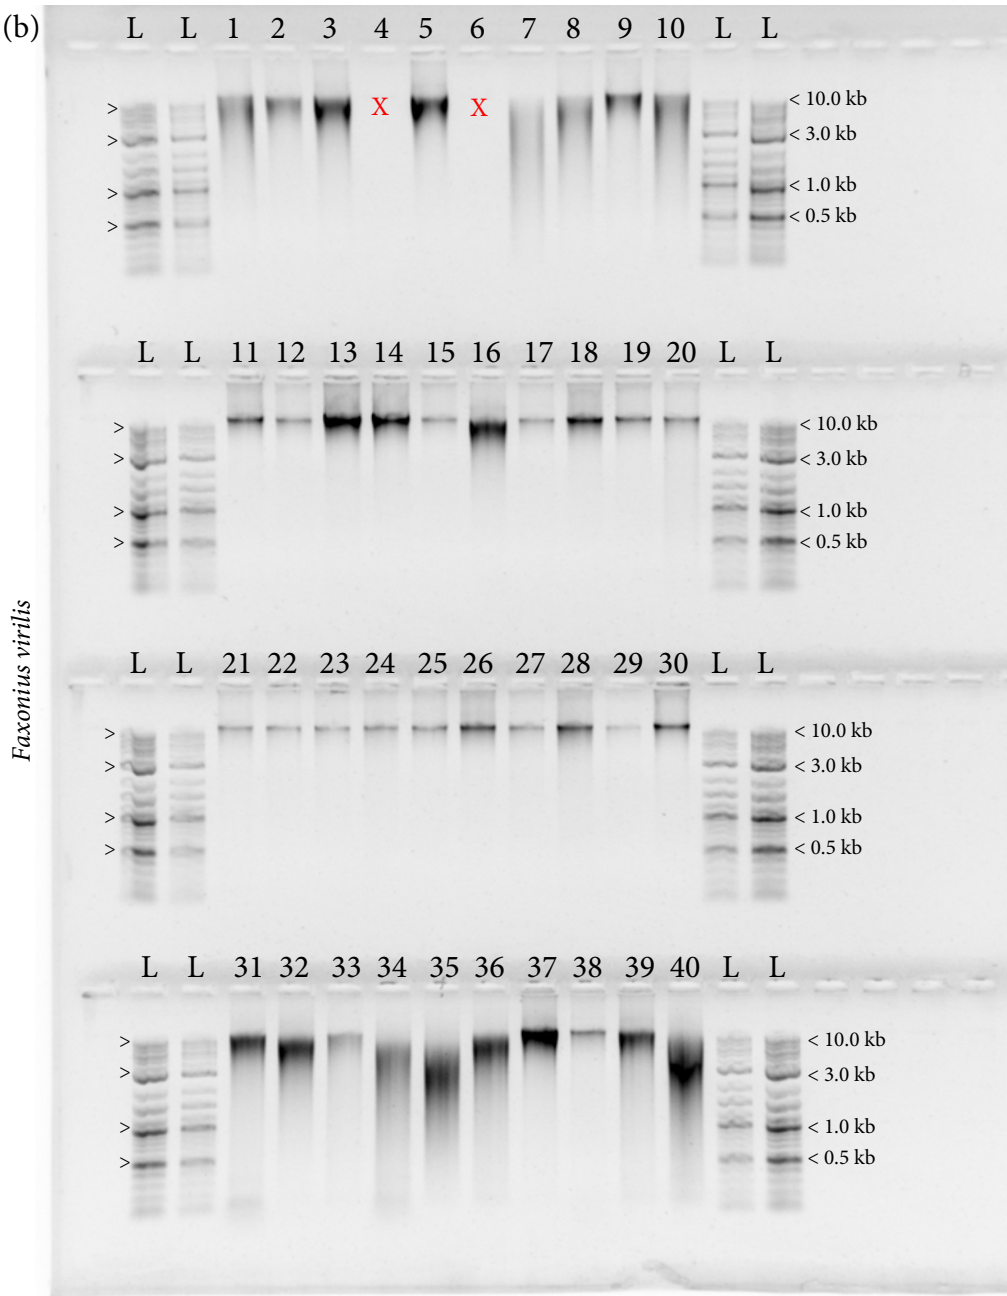

X X X X X X X X X X X X X X

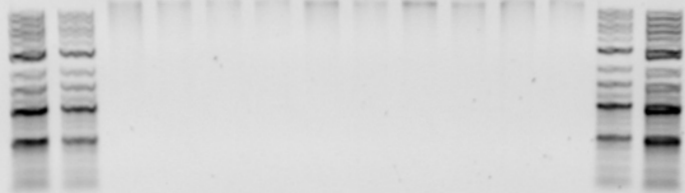

(b)

L L 41 42 43 44 45 46 47 48 49 50 L L

*Faenionus virilis*

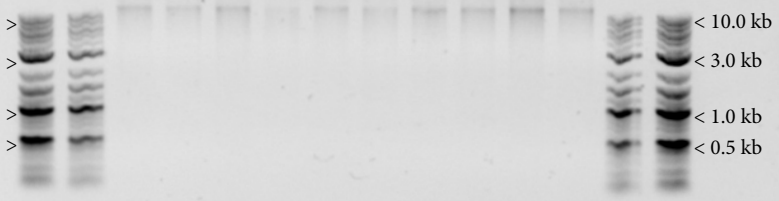

X X X X X X X X X X X X X X

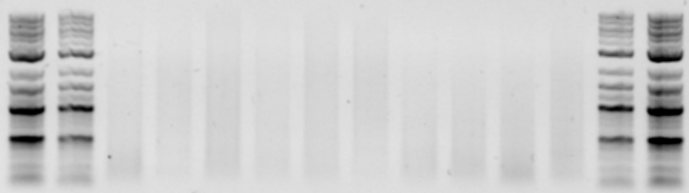

(c)

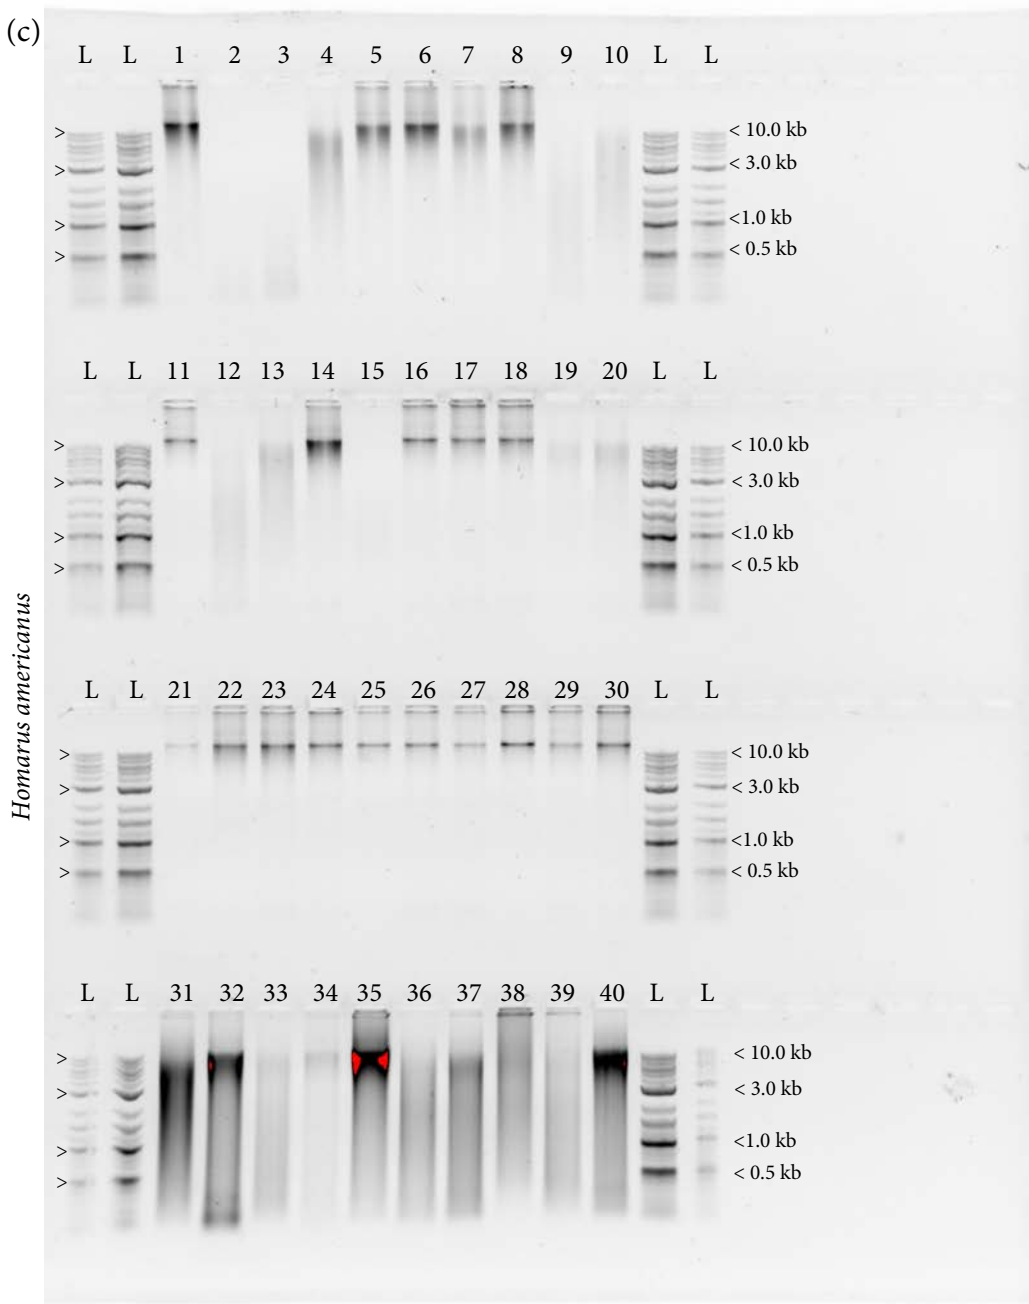

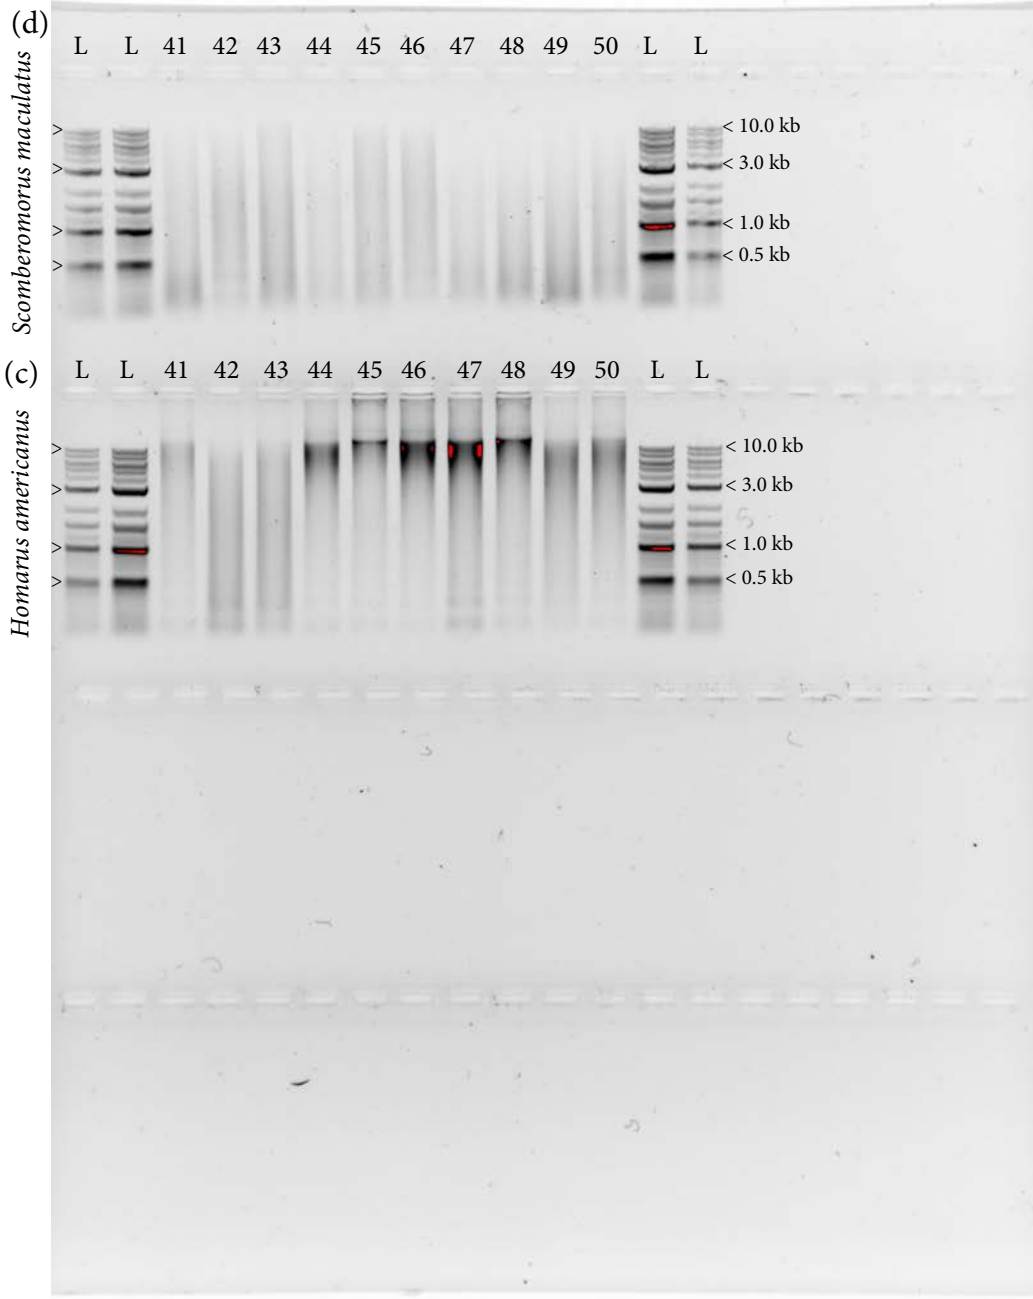

(d)

*Scomberomorus maculatus*

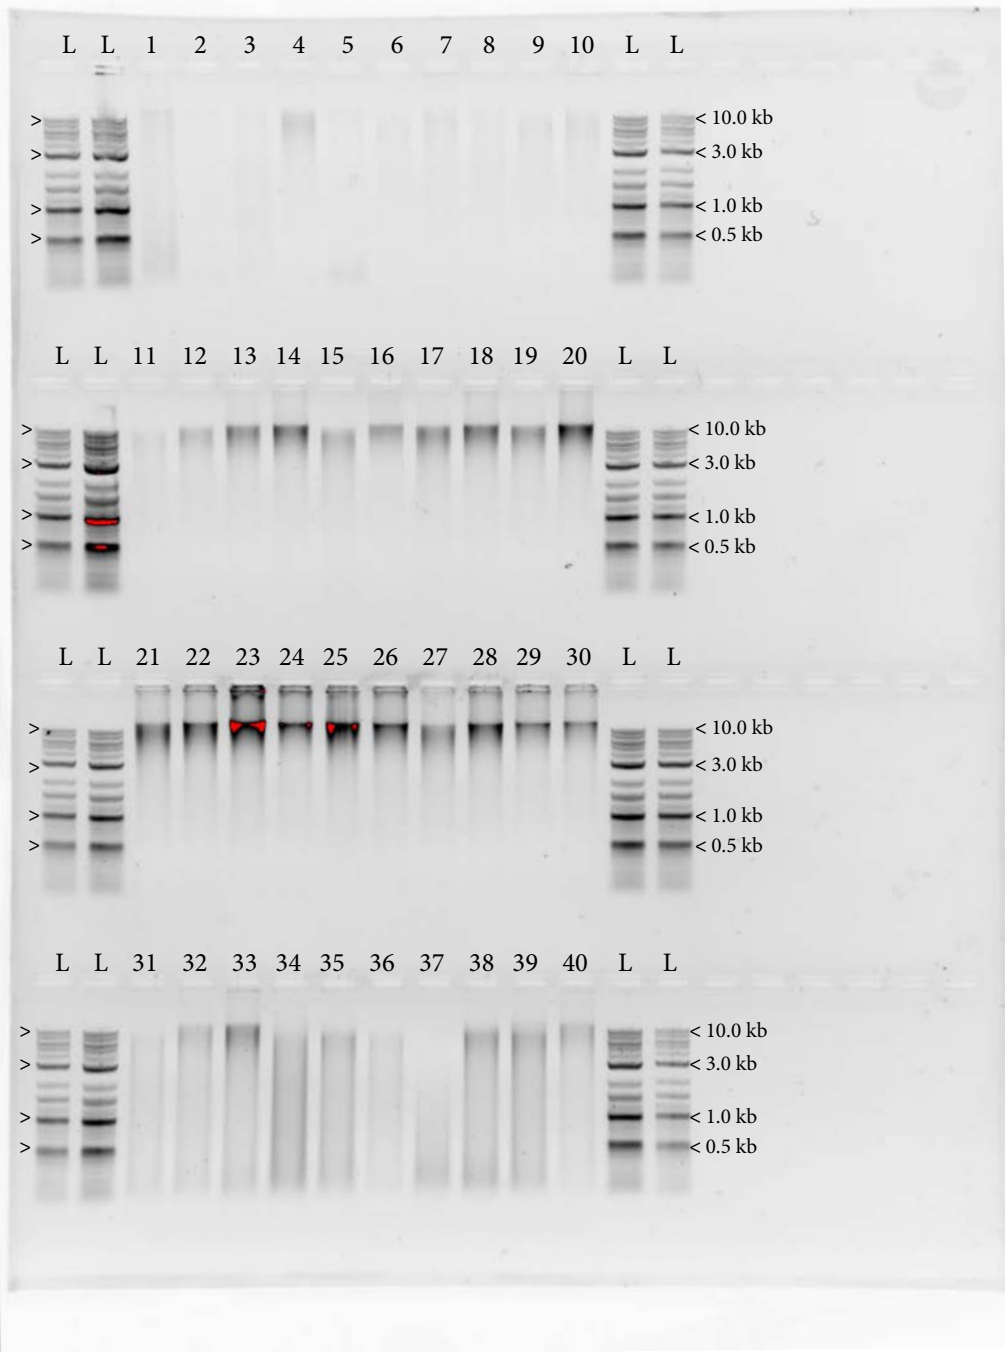





(e)

*Mercenaria mercenaria*

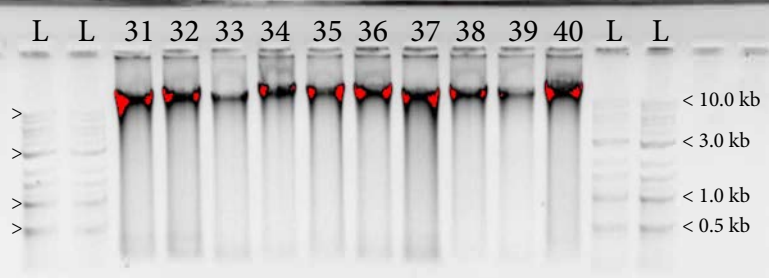

Supplement: pone.0280807.s003.pdf [file pone.0280807.s003.pdf]
